# Supplementary material
Source: PubMed Central journal article supplement (PMC2670391)
Supplement: NIHMS3502-supplement-1.pdf [file NIHMS3502-supplement-1.pdf]

### Supplementary references

1. Sahlender, D.A. et al. Optineurin links myosin VI to the Golgi complex and is involved in Golgi organization and exocytosis. *J Cell Biol* **169**, 285-295 (2005).
2. Combet, C., Blanchet, C., Geourjon, C. & Deleage, G. [NPS@](#): network protein sequence analysis. *Trends Biochem Sci* **25**, 147-50 (2000).
3. Morris, S.M. & Cooper, J.A. Disabled-2 colocalizes with the LDLR in clathrin-coated pits and interacts with AP-2. *Traffic* **2**, 111-23 (2001).
4. Mishra, S.K. et al. Disabled-2 exhibits the properties of a cargo-selective endocytic clathrin adaptor. *Embo J* **21**, 4915-26 (2002).
5. Pollard, T.D. & Borisy, G.G. Cellular motility driven by assembly and disassembly of actin filaments. *Cell* **112**, 453-65 (2003).
6. Weisman, L.S. Organelles on the move: insights from yeast vacuole inheritance. *Nat Rev Mol Cell Biol* **7**, 243-52 (2006).
