# Supplementary material
Source: PubMed Central journal article supplement (PMC2670391)
Supplement: NIHMS3502-supplement-legfigS2.pdf [file NIHMS3502-supplement-legfigS2.pdf]

### **Supplementary Information.**

**Figure S2.** Possible roles for myosin VI in the early stages of clathrin mediated endocytosis. We speculate that at **(1)** Dab2 is bound via its N-terminal phosphotyrosine (PTB) motif to the cytoplasmic tail of a LDL receptor<sup>3</sup> and is bound to PIP<sub>2</sub> (P) in the plasma membrane<sup>4</sup>. Myosin VI (MD denotes its motor domain and 1 and 2 the domains in the C-terminal tail) is recruited to the plasma membrane by binding to Dab2 and also to PIP<sub>2</sub> (P). Possibly by interacting with newly polymerised actin filaments (initiated by the WASP/Scar/PIP<sub>2</sub> and Arp2/3 complexes<sup>5</sup>), myosin VI could cluster the receptors and then generate sufficient force to pull the membrane inwards to form a nascent clathrin coated pit at **(2)**. The clustering of myosin VI in such a 'pit' might favour dimerisation or multimerisation (possible CT tail interactions indicated by double headed arrow) and the resulting myosin VI dimers (multimers) together with the endocytic machinery (AP-2, clathrin and accessory proteins) and the actin filament network could be involved in the formation of clathrin coated vesicles, their uncoating and then subsequent delivery into the cell. At this stage it should be stressed that multiple myosin VI monomers might also be able to accomplish the same tasks. A recent relevant review by Lois Weisman<sup>6</sup> explores possible molecular mechanisms for membrane-cargo transport by myosin V.
